# Supplementary material for: Large mesopelagic fishes biomass and trophic efficiency in the open ocean
Source: PubMed Central journal article supplement — Nat Commun. 2014 Feb 7;5:3271. doi: 10.1038/ncomms4271 (PMC3926006; doi:10.1038/ncomms4271), 2014-02-07
Supplement: ncomms4271-s1.pdf [file ncomms4271-s1.pdf]

## Supplementary Information

### Supplementary Figures:

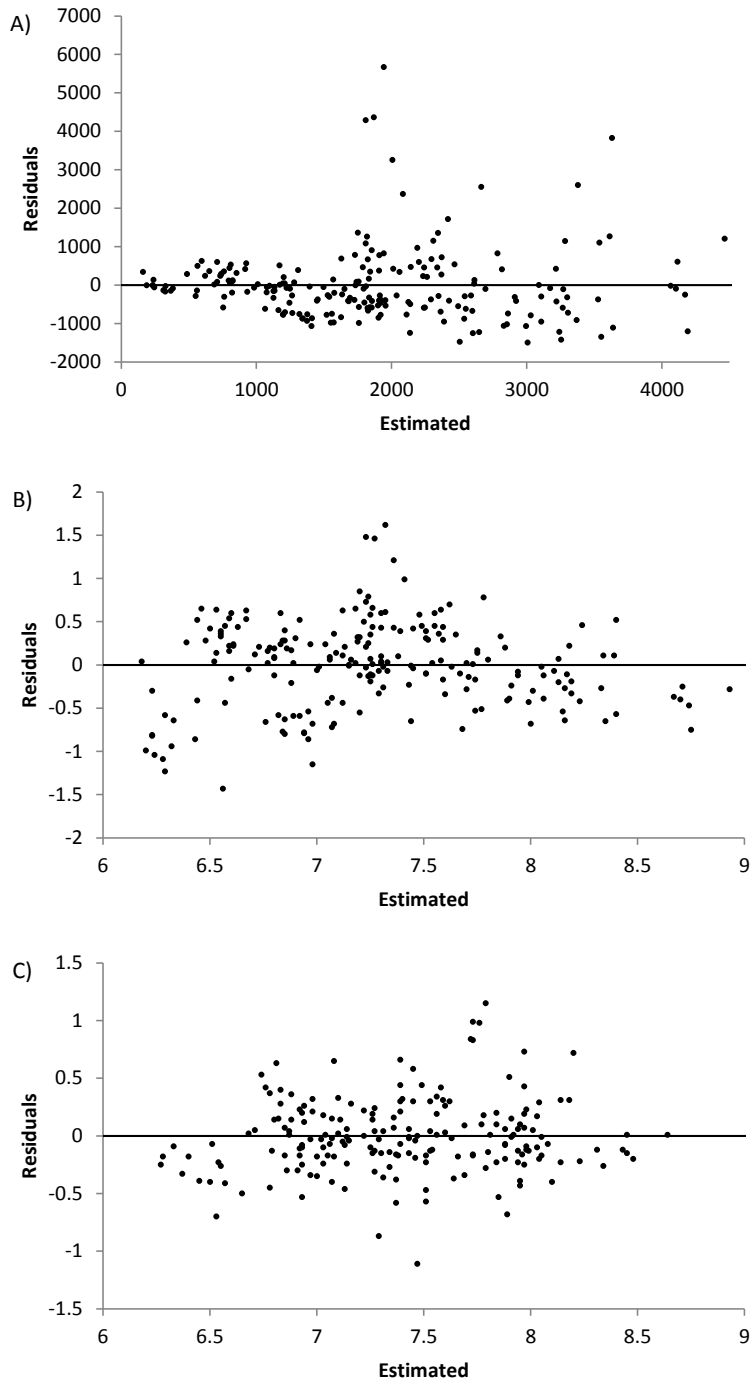

**Supplementary Figure 1:** Relation between estimates and residuals for the different regressions. A) Non transformed data, B) ln transformed data and C) GWR regression

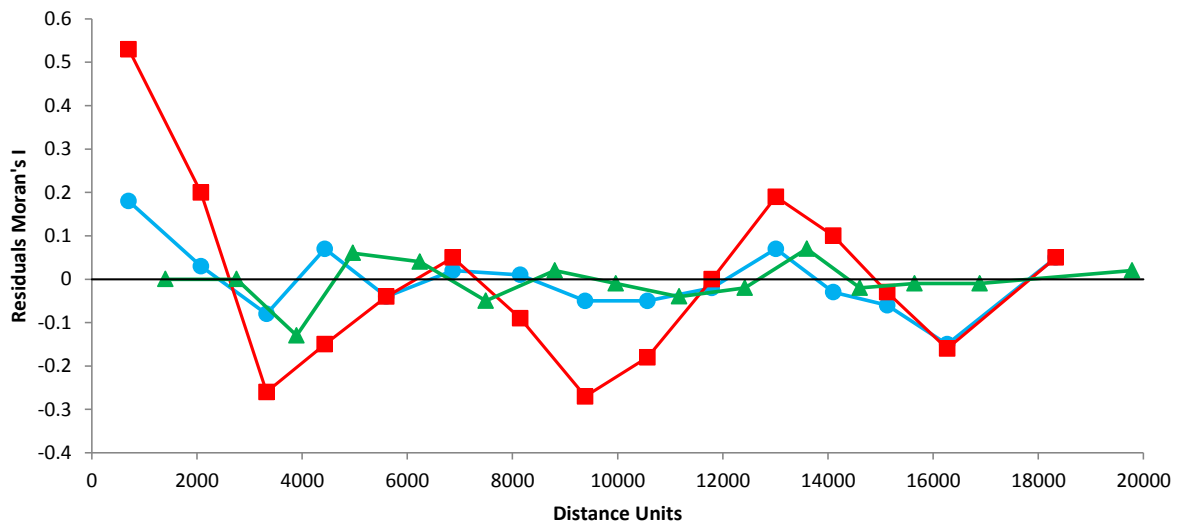

**Supplementary Figure 2:** Spatial autocorrelation analysis. Moran's I values as a function of distance for the residuals of the different regressions (blue non transformed data, red ln transformed data and green GWR regression)

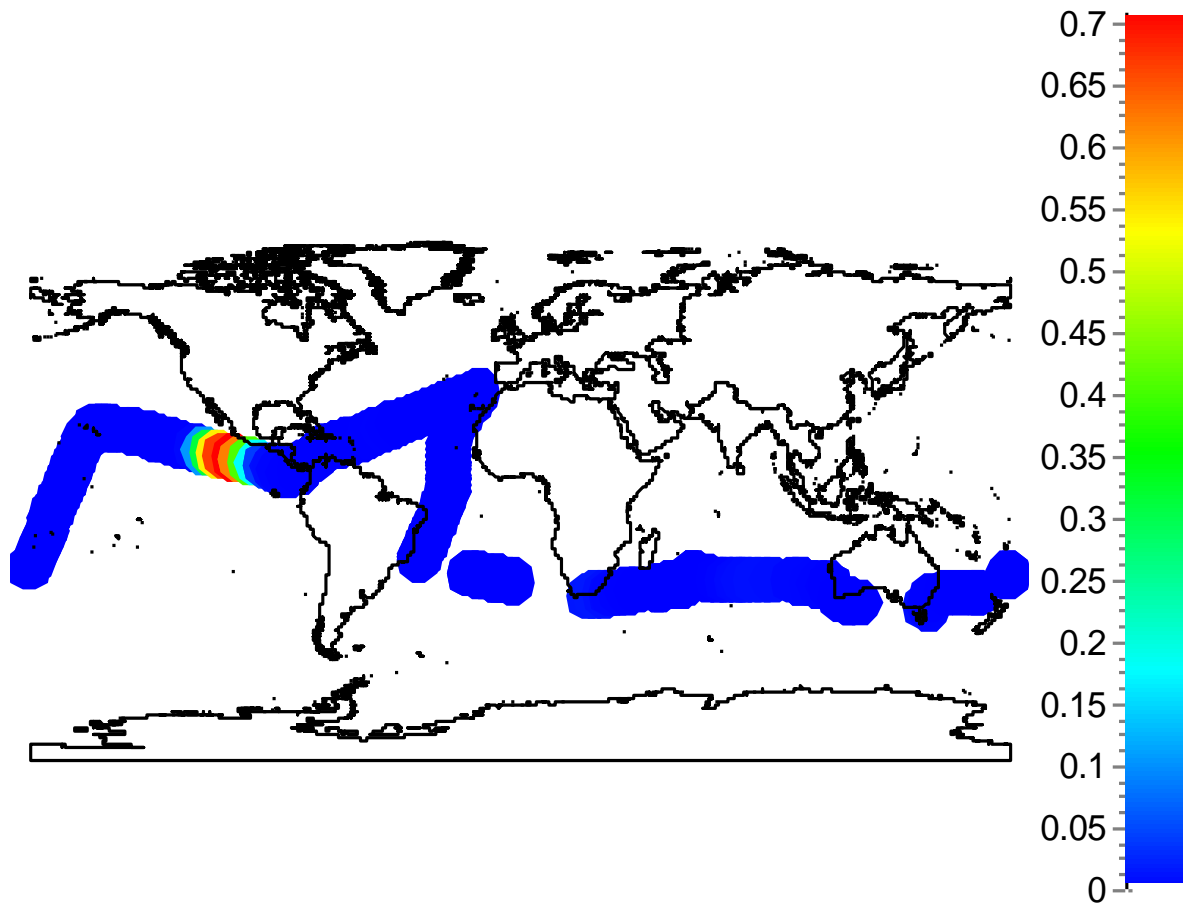

**Supplementary Figure 3:** Geographically weighted regression. Spatial distribution of the local regressions slope significance using GWR.

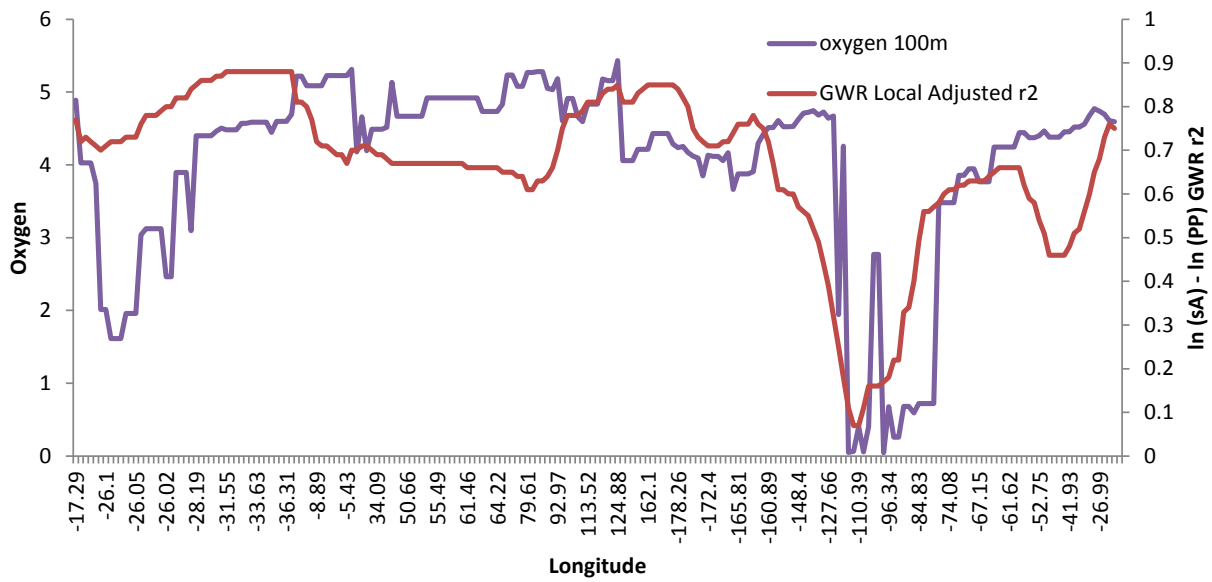

**Supplementary Figure 4:** Ln (sA) – Ln (PP) GWR local  $r^2$  and oxygen at 100 m depth along the Malaspina transect.

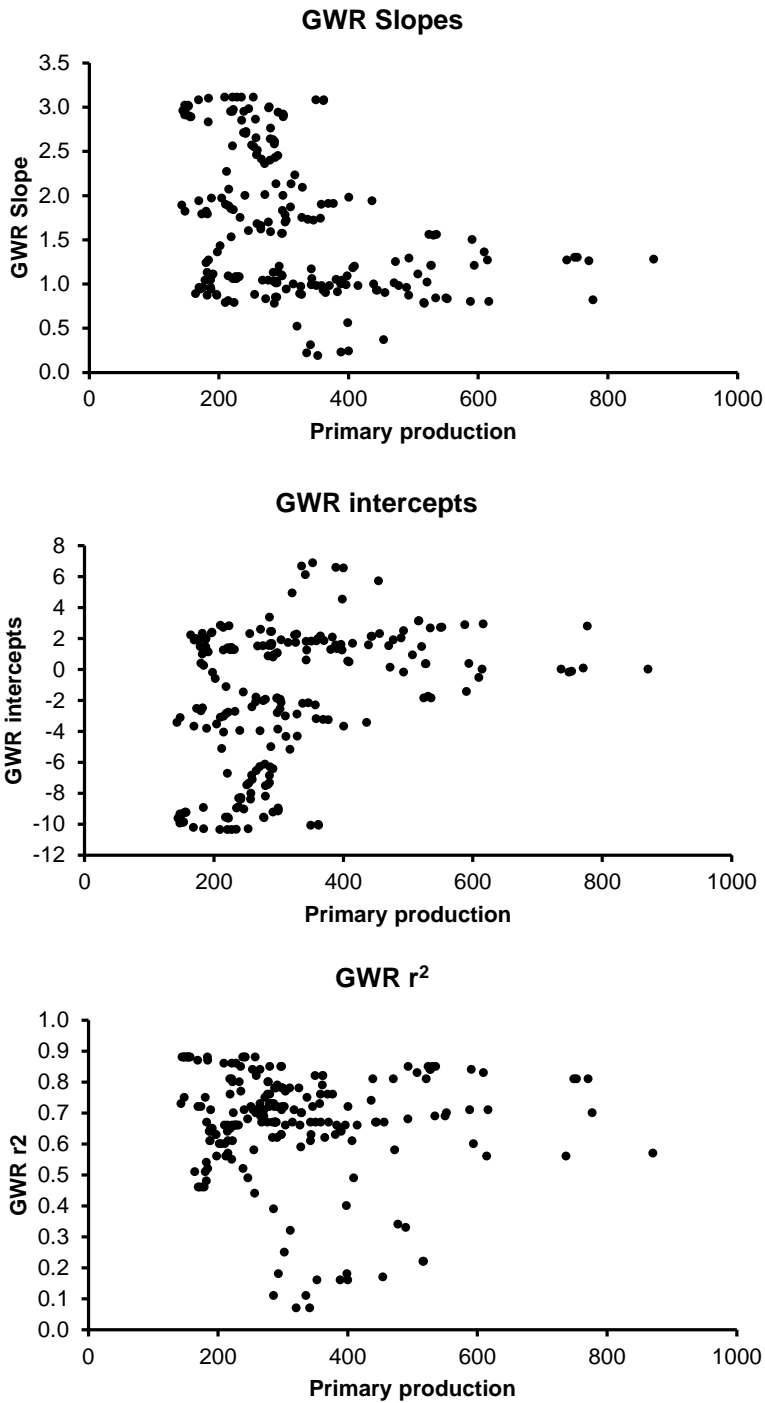

**Supplementary Figure 5: Parameters of the geographically weighted regression.** Slope (top panel), intercept (middle panel) and  $r^2$  of the geographically weighted regression as a function of primary production.

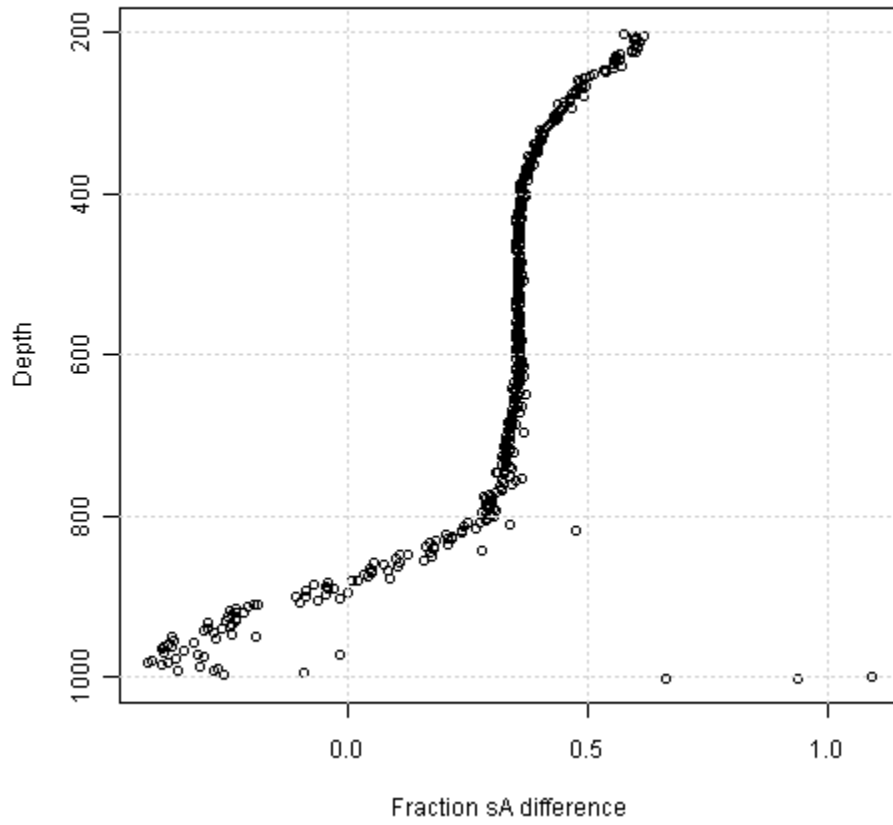

**Supplementary Figure 6:** Analysis of the acoustic processing bias. Ratio of difference between the two estimates and the median filtered  $s_A$  values, plotted in relation to depth.

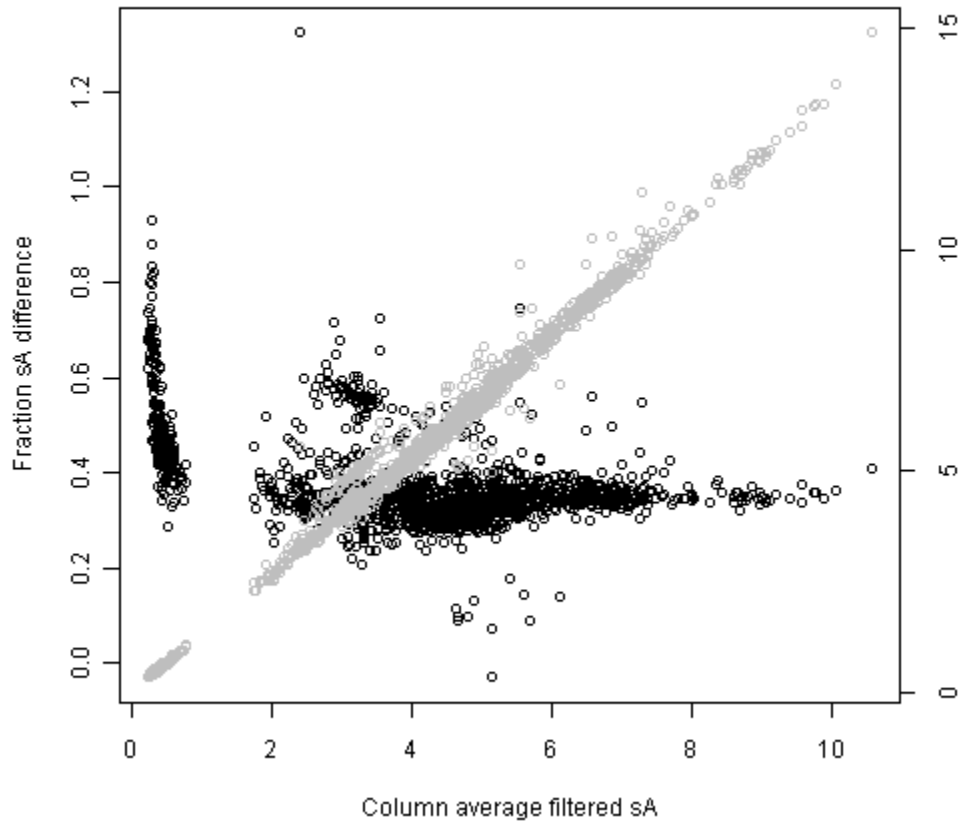

**Supplementary Figure 7:** Analysis of the acoustic processing bias. Paired  $s_A$  estimates produced by standard postprocessing methods plotted in relation to median-filtered  $s_A$  values, in periods of little noise [grey circles] and the ratio of the difference between the 2 estimates and the median filtered  $s_A$  values, plotted in relation to median filtered  $s_A$  values [black circles].

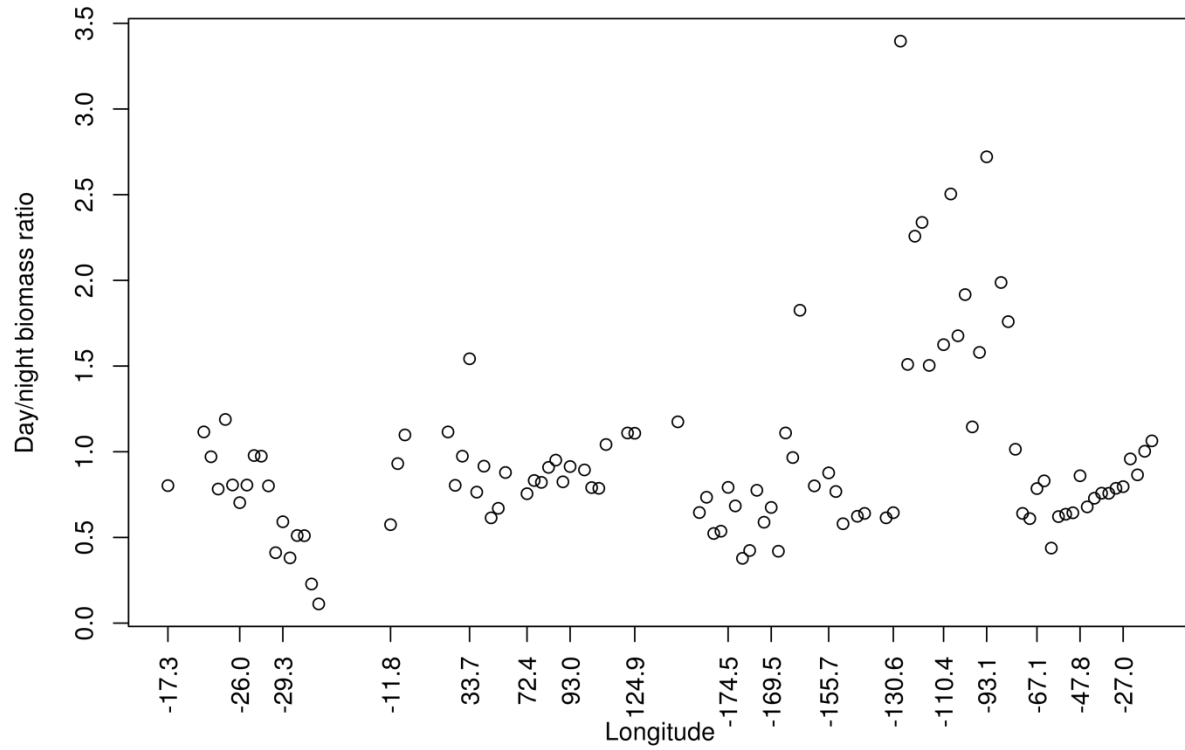

**Supplementary Figure 8:** Ratio of paired total day and night backscatter values.



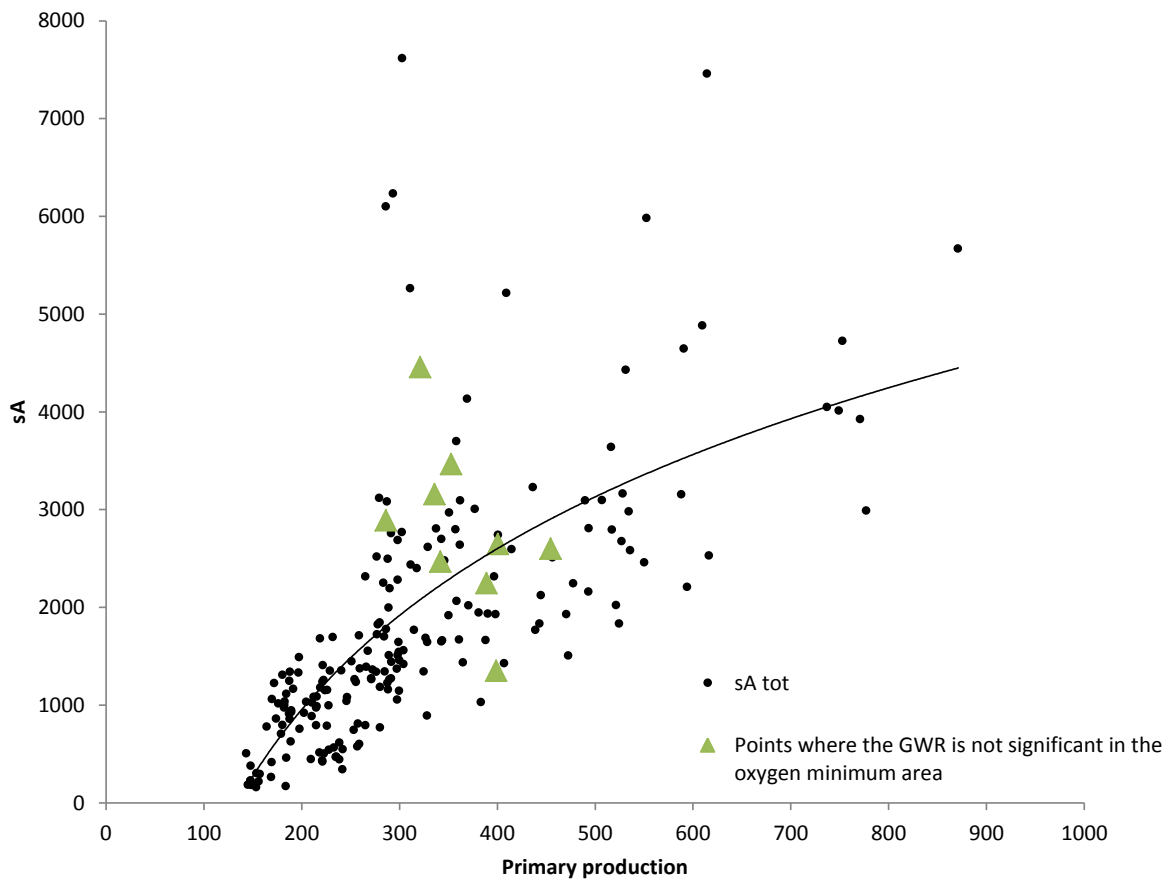

**Supplementary Figure 9:** Analysis of the potential resonance effect. Relation between primary production and backscatter indicating the points in the area of a shallow oxygen minimum where the GWR is not significant and the day/night ratio of the backscatter was between 2 and 3.

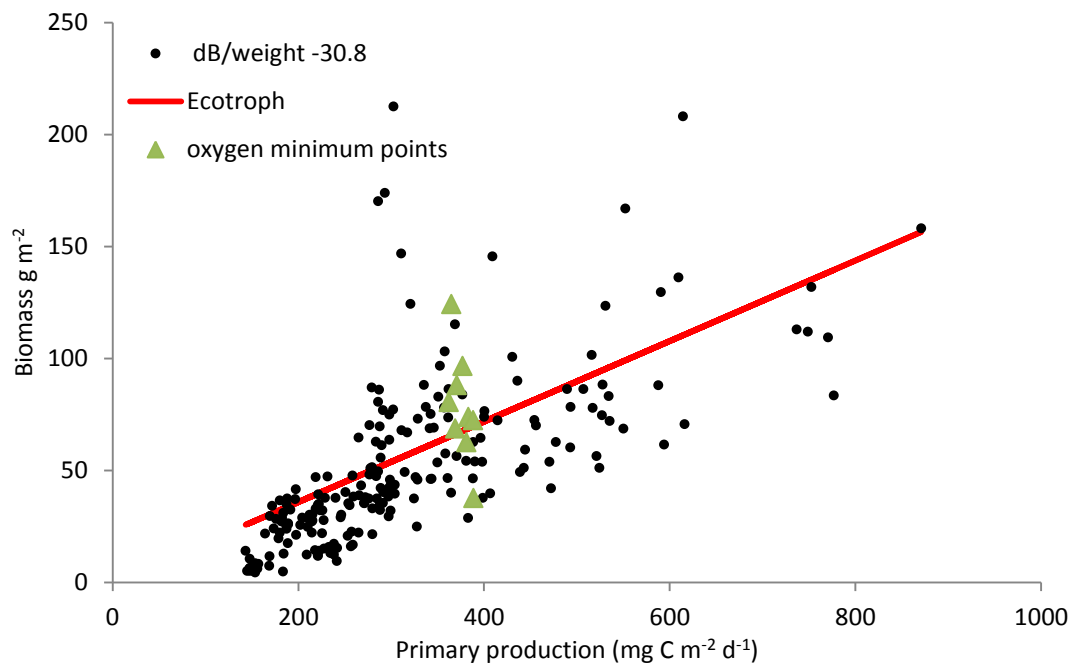

**Supplementary Figure 10:** Analysis of the potential resonance effect. Biomass estimates from acoustics and Ecotroph as a function of the primary production along the Malaspina transect. The triangles indicate the points in the area of a shallow oxygen minimum where the GWR is not significant and the day/night ratio of the backscatter was between 2 and 3.

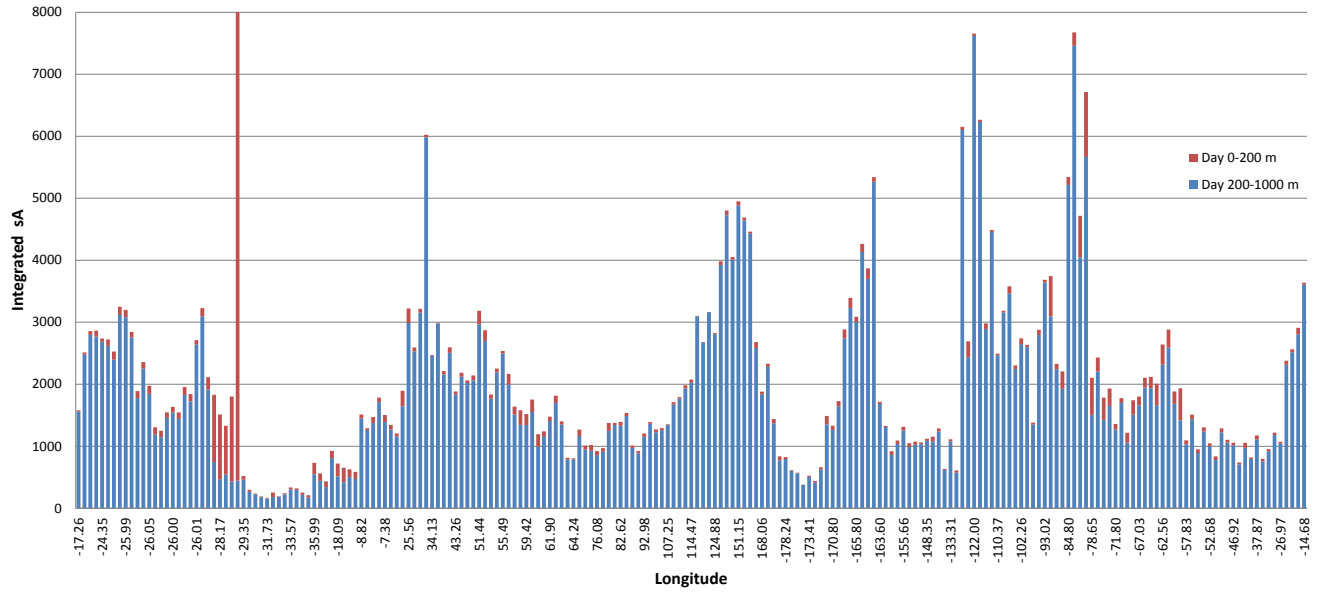

**Supplementary Figure 11: Epipelagic fish.** Total backscatter values in the 0 – 200 layer [red] and 200 – 1000 layer [blue] in the daytime along the cruise trajectory.

## Supplementary Tables

**Supplementary Table 1:** Parameters of the three regression approaches considered. Non-transformed data ordinary least squares regression (OLS), Ln transformed data (OLS ln-ln) and geographically weighted regression on ln transformed data (GWR ln-ln)

|                                                                          | OLS     | OLS ln-ln | GWR ln-ln |
|--------------------------------------------------------------------------|---------|-----------|-----------|
| Effective Number of Parameters:                                          | 2.00    | 2.00      | 15.96     |
| Akaike Information Criterion (AICc):                                     | 3470.92 | 306.84    | 157.65    |
| Correlation Coefficient (r):                                             | 0.69    | 0.77      | 0.91      |
| Coefficient of Determination (r <sup>2</sup> ):                          | 0.48    | 0.59      | 0.83      |
| Adjusted r-square (r <sup>2</sup> Adj):                                  | 0.48    | 0.59      | 0.81      |
| F (r <sup>2</sup> ):                                                     | 192.28  | 293.47    | 61.06     |
| P-value (r <sup>2</sup> ):                                               | <0.001  | <0.001    | <0.001    |
| Slope                                                                    | 2374.00 | 1.52      |           |
| Median slope                                                             |         |           | 1.36      |
| Lower quartile slope                                                     |         |           | 1.00      |
| Upper quartile slope                                                     |         |           | 2.27      |
| Minimum slope                                                            |         |           | 0.19      |
| Maximum slope                                                            |         |           | 3.11      |
| Median slope for PP values < 400 mg C m <sup>-2</sup> d <sup>-1</sup>    |         |           | 1.72      |
| Median slope for PP values >400 mg C m <sup>-2</sup> d <sup>-1</sup>     |         |           | 1.11      |
| Constant                                                                 | 11624.0 | -1.36     |           |
|                                                                          | 0       |           |           |
| Median constant                                                          |         |           | -0.20     |
| lower quartile constant                                                  |         |           | -5.18     |
| Upper quartile constant                                                  |         |           | 1.66      |
| Minimum constant                                                         |         |           | -10.36    |
| Maximum constant                                                         |         |           | 6.87      |
| Median constant for PP values < 400 mg C m <sup>-2</sup> d <sup>-1</sup> |         |           | -2.21     |
| Median constant for PP values >400 mg C m <sup>-2</sup> d <sup>-1</sup>  |         |           | 0.93      |

**Supplementary Table 2:** Average temperatures in different layers during the Malaspina cruise. WMD refers to the weighted mean depth of the acoustic backscatter in the 200 to 1000 m layer.

| Temperature °C            | Average temperature 0 – 4000 m | Average temperature 0 – 1000 m | Daytime Acoustic WMD* temperature | Average temperature between daytime and night-time WMD* |
|---------------------------|--------------------------------|--------------------------------|-----------------------------------|---------------------------------------------------------|
| Cruise Average            | 5.6                            | 11.5                           | 9.2                               | 9.1                                                     |
| Cruise standard deviation | 1.7                            | 1.6                            | 1.9                               | 2.0                                                     |
| Cruise Maximum            | 14.3                           | 14.6                           | 13.1                              | 13.2                                                    |
| Cruise minimum            | 3.8                            | 9.1                            | 5.7                               | 5.9                                                     |

**Supplementary Table 3:** Effects of water clarity on the theoretical search volume [ $c^{-2}K^{-1}$ ] when going from clear oceanic water to murky coastal water. The attenuation coefficient for downwelling irradiance [ $K$ ] is the observed attenuation of PAR given as an average of all stations during the cruise. The beam attenuation coefficient was approximated from the relationship in Kaartvedt *et al.*<sup>1</sup>:  $K = 0.22c - 0.029$  [ $r^2 = 0.98$ ,  $n = 4984$ ], where  $c$  was measured at 660 nm.

|                        | $K$<br>$m^{-1}$ | $K^{-1}$<br>m | $c^{-2}$<br>$m^2$ | $c^{-2}K^{-1}$<br>$m^3$ |
|------------------------|-----------------|---------------|-------------------|-------------------------|
| Malaspina<br>cruise    | 0.044           | 22.7          | 9.1               | 207                     |
| Murky coastal<br>water | 0.10            | 10.0          | 2.9               | 29                      |
|                        | 0.15            | 6.7           | 1.5               | 10                      |

## Supplementary References

1. Kaartvedt, S., Staby, A. & Aksnes, D. L. Efficient trawl avoidance by mesopelagic fishes causes large underestimation of their biomass. *Mar Ecol-Prog Ser* **456**, 1-6 (2012).
